# Supplementary material for: Increase in assisted suicide in Switzerland: did the socioeconomic predictors change? Results from the Swiss National Cohort
Source: PubMed Central journal article supplement — BMJ Open. 2018 Apr 17;8(4):e020992. doi: 10.1136/bmjopen-2017-020992 (PMC5905761; doi:10.1136/bmjopen-2017-020992), 2018-04-17
Supplement: bmjopen-2017-020992supp001.pdf [file bmjopen-2017-020992supp001.pdf]

**Supplementary table 1 Number of assisted suicides of Swiss residents in the annual reports of the right-to-die organisations Exit Deutschschweiz (Exit\_DS), Exit Suisse Romande (Exit\_SR) and Dignitas and number of assisted suicides identified in the SNC by year**

| Year         | Annual Reports of Right-to-Die Organisations |             |            |             | Identified in SNC | %    |
|--------------|----------------------------------------------|-------------|------------|-------------|-------------------|------|
|              | Exit_DS                                      | Exit_SR     | Dignitas   | Total       |                   |      |
| <b>2003</b>  | 131                                          | 48          | 9          | <b>188</b>  | 180               | 95.7 |
| <b>2004</b>  | 154                                          | 42          | 14         | <b>210</b>  | 198               | 94.3 |
| <b>2005</b>  | 162                                          | 54          | 12         | <b>228</b>  | 209               | 91.7 |
| <b>2006</b>  | 150                                          | 65          | 15         | <b>230</b>  | 218               | 94.8 |
| <b>2007</b>  | 179                                          | 66          | 6          | <b>251</b>  | 231               | 92.0 |
| <b>2008</b>  | 167                                          | 75          | 10         | <b>252</b>  | 239               | 94.8 |
| <b>2009</b>  | 217                                          | 69          | 4          | <b>290</b>  | 278               | 95.9 |
| <b>2010</b>  | 257                                          | 91          | 6          | <b>354</b>  | 330               | 93.2 |
| <b>2011</b>  | 305                                          | 111         | 11         | <b>427</b>  | 386               | 90.4 |
| <b>2012</b>  | 356                                          | 144         | 13         | <b>513</b>  | 446               | 86.9 |
| <b>2013</b>  | 459                                          | 155         | 8          | <b>622</b>  | 538               | 86.5 |
| <b>2014</b>  | 583                                          | 175         | 6          | <b>764</b>  | 688               | 90.1 |
| <b>Total</b> | <b>3120</b>                                  | <b>1095</b> | <b>114</b> | <b>4329</b> | <b>3941</b>       | 91.0 |

**Supplementary table 2 Categories of underlying diseases and corresponding ICD-10 codes**

| <b>Category</b>                                     | <b>ICD-10 codes</b>                                                                                        |
|-----------------------------------------------------|------------------------------------------------------------------------------------------------------------|
| <b>All cancer</b>                                   | C00-C97                                                                                                    |
| <i>Colon and other digestive organs</i>             | C15-C26                                                                                                    |
| <i>Lung and other respiratory organs</i>            | C30-C39                                                                                                    |
| <i>Breast</i>                                       | C50                                                                                                        |
| <i>Prostate and other male genital</i>              | C60-C63                                                                                                    |
| <i>Others</i>                                       | C00-C14, C40-C49, C51-C58, C64-C97                                                                         |
| <b>Mental and behavioural disorders</b>             | F00-F99                                                                                                    |
| <i>Dementia</i>                                     | F00-F03                                                                                                    |
| <i>Mood disorders</i>                               | F30-F39                                                                                                    |
| <i>Other mental and behave. disorders</i>           | F04-F29, F40-F99                                                                                           |
| <b>Diseases of the nervous system</b>               | G00-G99                                                                                                    |
| <i>Huntington disease</i>                           | G10                                                                                                        |
| <i>Motor neuron disease (incl. ALS)</i>             | G12.2                                                                                                      |
| <i>Parkinson's disease</i>                          | G20                                                                                                        |
| <i>Alzheimer</i>                                    | G30                                                                                                        |
| <i>Multiple sclerosis</i>                           | G35                                                                                                        |
| <i>Paralytic syndromes</i>                          | G80-G83                                                                                                    |
| <i>Other diseases of the nervous system</i>         | G00-G09, G11-G12.1, G12.8-G14, G21-G26, G31-G32, G36-G73, G90-G99                                          |
| <b>Diseases of the circulatory system</b>           | I00-I99                                                                                                    |
| <i>Ischaemic heart diseases</i>                     | I20-I25                                                                                                    |
| <i>Heart failure</i>                                | I50                                                                                                        |
| <i>Cerebrovascular disease</i>                      | I60-I69                                                                                                    |
| <i>Other diseases of the circulatory system</i>     | I00-I15, I26-I49, I51-I52, I70-I99                                                                         |
| <b>Diseases of the respiratory system</b>           | J00-J99                                                                                                    |
| <i>Chronic obstructive pulmonary disease (COPD)</i> | J44                                                                                                        |
| <i>Other diseases of the respiratory system</i>     | J00-J43, J45-J99                                                                                           |
| <b>Diseases of the musculoskeletal system</b>       | M00-M99                                                                                                    |
| <i>Arthropathies</i>                                | M00-M25                                                                                                    |
| <i>Dorsopathies</i>                                 | M40-M54                                                                                                    |
| <i>Osteoporosis</i>                                 | M80-M82                                                                                                    |
| <i>Other diseases of the musculoskeletal system</i> | M30-M36, M60-M79, M83-M99                                                                                  |
| <b>Other diseases</b>                               | A00-B99, D00-D89, E00-E90, H00-H95, K00-K93, L00-L99, N00-N99, O00-O99, P00-P96, Q00-Q99, R00-R68, R70-R98 |
| <b>No/Unknown cause of death</b>                    | R69, R99                                                                                                   |

**Supplementary table 3 Underlying diagnoses: Number and percentage of assisted suicides, per age group and time period**

| Diagnosis                                | 25-64 years old |             |            |             |            |             | 65-94 years old |             |              |             |              |             |
|------------------------------------------|-----------------|-------------|------------|-------------|------------|-------------|-----------------|-------------|--------------|-------------|--------------|-------------|
|                                          | 2003-2008       |             | 2009-2014  |             | Total      |             | 2003-2008       |             | 2009-2014    |             | Total        |             |
|                                          | Nr              | %           | Nr         | %           | Nr         | %           | Nr              | %           | Nr           | %           | Nr           | %           |
| <b>Cancer</b>                            | <b>159</b>      | <b>51.3</b> | <b>243</b> | <b>52.7</b> | <b>402</b> | <b>52.1</b> | <b>385</b>      | <b>39.9</b> | <b>862</b>   | <b>39.1</b> | <b>1,247</b> | <b>39.3</b> |
| <i>Colon and other digestive organs</i>  | 44              | 14.2        | 73         | 15.9        | 117        | 15.1        | 104             | 10.8        | 236          | 10.7        | 340          | 10.7        |
| <i>Lung and other respiratory organs</i> | 28              | 9.0         | 40         | 8.7         | 68         | 8.9         | 43              | 4.5         | 135          | 6.1         | 178          | 5.6         |
| <i>Breast</i>                            | 21              | 6.8         | 32         | 6.9         | 53         | 6.9         | 47              | 4.9         | 90           | 4.1         | 137          | 4.3         |
| <i>Prostate and other male genital</i>   | 6               | 1.9         | 8          | 1.7         | 14         | 1.8         | 57              | 5.9         | 102          | 4.6         | 159          | 5.0         |
| <i>Others</i>                            | 60              | 19.4        | 90         | 19.5        | 150        | 19.4        | 134             | 13.9        | 299          | 13.6        | 433          | 13.7        |
| <b>Mental and behavioural</b>            | <b>14</b>       | <b>4.5</b>  | <b>31</b>  | <b>6.7</b>  | <b>45</b>  | <b>5.8</b>  | <b>36</b>       | <b>3.7</b>  | <b>98</b>    | <b>4.4</b>  | <b>134</b>   | <b>4.2</b>  |
| <i>Mood disorders</i>                    | 11              | 3.5         | 12         | 2.6         | 23         | 2.9         | 28              | 2.9         | 64           | 2.9         | 92           | 2.9         |
| <i>Dementia</i>                          | 0               |             | 2          | 0.4         | 2          | 0.2         | 5               | 0.5         | 22           | 1.0         | 27           | 0.8         |
| <i>Other</i>                             | 3               | 1.0         | 17         | 3.7         | 20         | 2.6         | 3               | 0.3         | 12           | 0.5         | 15           | 0.5         |
| <b>Nervous system</b>                    | <b>62</b>       | <b>20.0</b> | <b>110</b> | <b>23.9</b> | <b>172</b> | <b>22.3</b> | <b>105</b>      | <b>10.9</b> | <b>268</b>   | <b>12.2</b> | <b>373</b>   | <b>11.8</b> |
| <i>Motor neuron disease</i>              | 17              | 5.5         | 18         | 3.9         | 35         | 4.5         | 27              | 2.8         | 47           | 2.1         | 74           | 2.3         |
| <i>Parkinson's</i>                       | 1               | 0.3         | 3          | 0.7         | 4          | 0.5         | 32              | 3.3         | 74           | 3.4         | 106          | 3.3         |
| <i>Multiple sclerosis</i>                | 29              | 9.4         | 43         | 9.3         | 72         | 9.4         | 13              | 1.4         | 22           | 1.0         | 35           | 1.1         |
| <i>Huntington</i>                        | 1               | 0.3         | 9          | 1.9         | 10         | 1.3         | 0               | 0           | 3            | 0.1         | 3            | 0.1         |
| <i>Paralytic syndromes</i>               | 3               | 1.0         | 10         | 2.2         | 13         | 1.7         | 8               | 0.8         | 12           | 0.6         | 20           | 0.6         |
| <i>Alzheimer</i>                         | 0               | 0           | 3          | 0.7         | 3          | 0.4         | 5               | 0.5         | 20           | 0.9         | 25           | 0.8         |
| <i>Other</i>                             | 11              | 3.5         | 24         | 5.2         | 35         | 4.5         | 20              | 2.1         | 90           | 4.1         | 110          | 3.5         |
| <b>Circulatory system</b>                | <b>2</b>        | <b>0.7</b>  | <b>12</b>  | <b>2.6</b>  | <b>14</b>  | <b>1.8</b>  | <b>112</b>      | <b>11.6</b> | <b>268</b>   | <b>12.2</b> | <b>380</b>   | <b>12.0</b> |
| <i>Ischaemic</i>                         | 0               | 0           | 1          | 0.2         | 1          | 0.1         | 2               | 0.2         | 61           | 2.8         | 63           | 2.0         |
| <i>Heart failure</i>                     |                 |             |            |             |            |             | 1               | 0.1         | 26           | 1.2         | 27           | 0.8         |
| <i>Cerebrovascular</i>                   | 2               | 0.7         | 7          | 1.5         | 9          | 1.2         | 109             | 11.3        | 99           | 4.5         | 208          | 6.6         |
| <i>Other</i>                             | -               |             | 4          | 0.8         | 4          | 0.5         | 0               | 0           | 82           | 3.7         | 219          | 2.6         |
| <b>Respiratory system</b>                | <b>10</b>       | <b>3.2</b>  | <b>16</b>  | <b>3.5</b>  | <b>26</b>  | <b>3.4</b>  | <b>31</b>       | <b>3.2</b>  | <b>118</b>   | <b>5.4</b>  | <b>149</b>   | <b>4.7</b>  |
| <i>COPD</i>                              | 9               | 2.9         | 10         | 2.2         | 19         | 2.5         | 27              | 2.8         | 87           | 4.0         | 114          | 3.6         |
| <i>Other</i>                             | 1               | 0.3         | 6          | 1.3         | 7          | 0.9         | 4               | 0.4         | 31           | 1.4         | 35           | 1.1         |
| <b>Musculoskeletal</b>                   | <b>6</b>        | <b>1.9</b>  | <b>13</b>  | <b>2.8</b>  | <b>19</b>  | <b>2.5</b>  | <b>62</b>       | <b>6.4</b>  | <b>255</b>   | <b>11.6</b> | <b>317</b>   | <b>10.0</b> |
| <i>Arthropathies</i>                     | 2               | 0.6         | -          | -           | 2          | 0.3         | 16              | 1.7         | 88           | 4.0         | 104          | 3.3         |
| <i>Dorsopathies</i>                      | 1               | 0.3         | 6          | 1.3         | 7          | 0.9         | 23              | 2.3         | 90           | 4.1         | 113          | 3.5         |
| <i>Osteoporosis</i>                      | -               | -           | 1          | 0.2         | 1          | 0.1         | 17              | 1.8         | 46           | 2.1         | 63           | 2.0         |
| <i>Other</i>                             | 3               | 1.0         | 6          | 1.3         | 9          | 1.2         | 6               | 0.6         | 31           | 1.4         | 37           | 1.2         |
| <b>Other</b>                             | <b>32</b>       | <b>10.3</b> | <b>24</b>  | <b>5.2</b>  | <b>56</b>  | <b>7.3</b>  | <b>83</b>       | <b>8.6</b>  | <b>239</b>   | <b>10.8</b> | <b>322</b>   | <b>10.2</b> |
| <b>No condition listed</b>               | <b>25</b>       | <b>8.1</b>  | <b>12</b>  | <b>2.6</b>  | <b>37</b>  | <b>4.8</b>  | <b>151</b>      | <b>15.7</b> | <b>97</b>    | <b>4.4</b>  | <b>248</b>   | <b>7.8</b>  |
| <b>Total</b>                             | <b>310</b>      |             | <b>461</b> |             | <b>771</b> |             | <b>965</b>      |             | <b>2,205</b> |             | <b>3,170</b> |             |

**Supplementary table 4 Results of the Cox regression models by age group and time period**

| Characteristics            |                                    | Age group 25-64 years   |           |                         |           | Age group 65-94 years    |           |                          |           |
|----------------------------|------------------------------------|-------------------------|-----------|-------------------------|-----------|--------------------------|-----------|--------------------------|-----------|
|                            |                                    | 2003-2008               |           | 2009-2014               |           | 2003-2008                |           | 2009-2014                |           |
|                            |                                    | HR                      | 95%CI     | HR                      | 95%CI     | HR                       | 95% CI    | HR                       | 95% CI    |
| Gender                     | Male                               | 0.78                    | 0.62-0.99 | 0.77                    | 0.64-0.93 | 1.12                     | 0.96-1.29 | 1.01                     | 0.92-1.12 |
|                            | <b>Female</b>                      | 1                       |           | 1                       |           | 1                        |           | 1                        |           |
|                            | Wald test, 1df                     | $\chi^2=4.20, p=0.04$   |           | $\chi^2=7.08, p=0.008$  |           | $\chi^2=2.10, p=0.15$    |           | $\chi^2=0.08, p=0.7751$  |           |
| Religious affiliation      | Protestant                         | 1.38                    | 1.03-1.86 | 1.30                    | 1.02-1.65 | 1.83                     | 1.54-2.49 | 1.87                     | 1.66-2.10 |
|                            | <b>Catholic</b>                    | 1                       |           | 1                       |           | 1                        |           | 1                        |           |
|                            | No Affiliation                     | 2.86                    | 2.08-3.90 | 2.77                    | 2.16-3.56 | 5.68                     | 4.64-6.94 | 5.12                     | 4.49-5.83 |
|                            | Other/unknown                      | 1.61                    | 0.96-2.71 | 0.90                    | 0.55-1.47 | 2.07                     | 1.53-2.80 | 1.93                     | 1.56-2.39 |
|                            | Wald test, 3 df                    | $\chi^2=46.44, p<0.001$ |           | $\chi^2=77.60, p<0.001$ |           | $\chi^2=314.58, p<0.001$ |           | $\chi^2=645.78, p<0.001$ |           |
| Education                  | Compulsory                         | 0.83                    | 0.58-1.19 | 0.68                    | 0.49-0.95 | 0.58                     | 0.49-0.69 | 0.56                     | 0.50-0.64 |
|                            | <b>Secondary</b>                   | 1                       |           | 1                       |           | 1                        |           | 1                        |           |
|                            | Tertiary                           | 0.88                    | 0.67-1.16 | 1.02                    | 0.82-1.27 | 1.36                     | 1.15-1.60 | 1.27                     | 1.14-1.41 |
|                            | Unknown                            | 1.25                    | 0.51-3.07 | 0.51                    | 0.19-1.35 | 0.55                     | 0.28-1.08 | 0.57                     | 0.35-0.93 |
|                            | Wald test, 3 df                    | $\chi^2=2.03, p=0.57$   |           | $\chi^2=6.70, p=0.08$   |           | $\chi^2=64.07, p<0.001$  |           | $\chi^2=126.96, p<0.001$ |           |
| Marital status             | Single                             | 0.85                    | 0.57-1.26 | 1.33                    | 0.99-1.79 | 1.21                     | 0.89-1.65 | 0.94                     | 0.77-1.15 |
|                            | <b>Married</b>                     | 1                       |           | 1                       |           | 1                        |           | 1                        |           |
|                            | Widowed                            | 1.39                    | 0.82-2.36 | 0.96                    | 0.52-1.79 | 1.33                     | 1.09-1.62 | 1.40                     | 1.24-1.58 |
|                            | Divorced                           | 1.27                    | 0.90-1.79 | 1.70                    | 1.32-2.19 | 2.03                     | 1.59-2.58 | 1.95                     | 1.69-2.26 |
|                            | Wald test, 3 df                    | $\chi^2=5.48, p=0.14$   |           | $\chi^2=17.71, p<0.001$ |           | $\chi^2=34.57, p<0.001$  |           | $\chi^2=105.03, p<0.001$ |           |
| Type of household          | 1 person                           | 1.91                    | 1.40-2.62 | 1.56                    | 1.22-2.00 | 1.16                     | 0.97-1.40 | 1.11                     | 0.99-1.24 |
|                            | <b><math>\geq 2</math> persons</b> | 1                       |           | 1                       |           | 1                        |           | 1                        |           |
|                            | Institutions                       | 2.74                    | 1.09-6.86 | 1.59                    | 0.65-3.92 | 1.17                     | 0.74-1.84 | 1.42                     | 0.93-2.16 |
|                            | Wald test, 2 df                    | $\chi^2=18.20, p<0.001$ |           | $\chi^2=12.74, p=0.002$ |           | $\chi^2=2.57, p=0.28$    |           | $\chi^2=5.33, p=0.07$    |           |
| Children                   | <b>No</b>                          | 1                       |           | 1                       |           | 1                        |           | 1                        |           |
|                            | Yes                                | 0.53                    | 0.40-0.71 | 0.61                    | 0.48-0.78 | 0.81                     | 0.67-0.97 | 0.63                     | 0.56-0.71 |
|                            | Unknown                            | 0.84                    | 0.46-1.53 | 1.09                    | 0.66-1.79 | 0.64                     | 0.45-0.91 | 0.70                     | 0.55-0.89 |
|                            | Wald test, 1 df                    | $\chi^2=18.94, p<0.001$ |           | $\chi^2=15.51, p<0.001$ |           | $\chi^2=5.45, p=0.02$    |           | $\chi^2=63.09, p<0.001$  |           |
| Urbanicity                 | Urban                              | 1.17                    | 0.90-1.51 | 0.99                    | 0.80-1.23 | 1.28                     | 1.11-1.47 | 1.06                     | 0.97-1.17 |
|                            | <b>Peri-urban</b>                  | 1                       |           | 1                       |           | 1                        |           | 1                        |           |
|                            | Rural                              | 0.8                     | 0.59-1.17 | 0.87                    | 0.66-1.14 | 0.76                     | 0.61-0.95 | 0.69                     | 0.60-0.80 |
|                            | Wald test, 2 df                    | $\chi^2=18.94, p<0.001$ |           | $\chi^2=1.10, p=0.58$   |           | $\chi^2=25.72, p<0.001$  |           | $\chi^2=34.26, p<0.001$  |           |
| Neighbourhood index of SEP | <b>Lowest quintile</b>             | 1                       |           | 1                       |           | 1                        |           | 1                        |           |
|                            | Second quintile                    | 1.16                    | 0.77-1.75 | 1.30                    | 0.93-1.82 | 1.20                     | 0.92-1.55 | 1.00                     | 0.84-1.18 |
|                            | Third quintile                     | 1.20                    | 0.79-1.80 | 1.29                    | 0.92-1.81 | 1.46                     | 1.13-1.87 | 1.12                     | 0.96-1.34 |
|                            | Fourth quintile                    | 1.30                    | 0.87-1.95 | 1.48                    | 1.06-2.06 | 1.64                     | 1.28-2.10 | 1.35                     | 1.16-1.58 |
|                            | Highest quintile                   | 1.81                    | 1.21-2.69 | 1.53                    | 1.09-2.15 | 2.34                     | 1.83-2.98 | 1.79                     | 1.53-2.08 |
|                            | Wald test, 4 df                    | $\chi^2=18.94, p<0.001$ |           | $\chi^2=6.95, p=0.14$   |           | $\chi^2=65.39, p<0.001$  |           | $\chi^2=97.24, p<0.001$  |           |
| Language Region            | <b>German</b>                      | 1                       |           | 1                       |           | 1                        |           | 1                        |           |
|                            | French                             | 1.28                    | 0.99-1.67 | 1.43                    | 1.16-1.77 | 1.25                     | 1.07-1.45 | 1.18                     | 1.06-1.30 |
|                            | Italian                            | 0.94                    | 0.47-1.86 | 0.35                    | 0.14-0.85 | 0.96                     | 0.65-1.41 | 0.48                     | 0.34-0.68 |
|                            | Wald test, 2 df                    | $\chi^2=3.61, p=0.16$   |           | $\chi^2=17.72, p<0.001$ |           | $\chi^2=8.46, p=0.01$    |           | $\chi^2=30.58, p<0.001$  |           |
| Nationality                | <b>Swiss</b>                       | 1                       |           |                         |           | 1                        |           | 1                        |           |
|                            | Foreigner                          | 0.39                    | 0.25-0.62 | 0.57                    | 0.41-0.80 | 0.70                     | 0.53-0.92 | 0.67                     | 0.56-0.80 |
|                            | Wald test, 1 df                    | $\chi^2=16.81, p<0.001$ |           | $\chi^2=10.93, p<0.001$ |           | $\chi^2=6.58, p=0.01$    |           | $\chi^2=20.54, p<0.001$  |           |

**Supplementary table 5 Results of the logistic regression models by age group and time period**

| Characteristics            |                                    | Age group 25-64 years      |           |                         |            | Age group 65-94 years      |           |                          |            |
|----------------------------|------------------------------------|----------------------------|-----------|-------------------------|------------|----------------------------|-----------|--------------------------|------------|
|                            |                                    | 2003-2008                  |           | 2009-2014               |            | 2003-2008                  |           | 2009-2014                |            |
|                            |                                    | OR                         | 95%CI     | OR                      | 95%CI      | OR                         | 95% CI    | OR                       | 95% CI     |
| Gender                     | Male                               | 0.52                       | 0.41-0.66 | 0.54                    | 0.44-0.65  | 0.64                       | 0.55-0.75 | 0.65                     | 0.59-0.72  |
|                            | <b>Female</b>                      | 1                          |           | 1                       |            | 1                          |           | 1                        |            |
|                            | Wald test, 1 df                    | $\chi^2=28.80, p<0.01$     |           | $\chi^2=37.92, p<0.01$  |            | $\chi^2=33.65, p<0.01$     |           | $\chi^2=69.95, p<0.01$   |            |
| Age at death               | <b>25-34</b>                       | 1                          |           | 1                       |            |                            |           | 1                        |            |
|                            | 35-44                              | 1.36                       | 0.59-3.12 | 0.66                    | 0.33-1.332 |                            |           |                          |            |
|                            | 45-54                              | 1.25                       | 0.56-2.78 | 0.55                    | 0.29-1.07  |                            |           |                          |            |
|                            | 55-64                              | 1.33                       | 0.60-2.94 | 0.67                    | 0.35-1.28  |                            |           |                          |            |
|                            | <b>65-74</b>                       |                            |           |                         |            | 1                          |           | 1                        |            |
|                            | 75-84                              |                            |           |                         |            | 0.94                       | 0.80-1.10 | 0.92                     | 0.82-1.03  |
|                            | 85-94                              |                            |           |                         |            | 0.77                       | 0.64-0.94 | 0.73                     | 0.64-0.83  |
|                            | Wald test                          | 3df: $\chi^2=0.72, p=0.87$ |           | $\chi^2=4.74, p=0.19$   |            | 2df: $\chi^2=7.74, p=0.02$ |           | $\chi^2=27.07, p<0.01$   |            |
| Underlying disease         | <b>Cancer</b>                      | 1                          |           | 1                       |            | 1                          |           | 1                        |            |
|                            | Mental                             | 1.38                       | 0.78-2.44 | 2.19                    | 1.45-3.30  | 0.61                       | 0.43-0.87 | 0.42                     | 0.34-0.53  |
|                            | Nervous system                     | 6.91                       | 5.06-9.42 | 6.76                    | 5.29-8.65  | 1.53                       | 1.23-1.92 | 1.47                     | 1.27-1.60  |
|                            | Circulatory                        | 0.04                       | 0.01-0.14 | 0.13                    | 0.07-0.25  | 0.21                       | 0.17-0.27 | 0.26                     | 0.22-0.30  |
|                            | Respiratory                        | 1.08                       | 0.57-2.06 | 1.06                    | 0.63-1.77  | 0.35                       | 0.24-0.51 | 0.57                     | 0.47-0.70  |
|                            | Musculoskeletal                    | 3.81                       | 1.64-8.84 | 4.63                    | 2.51-8.52  | 4.92                       | 3.70-6.54 | 9.45                     | 8.08-11.06 |
|                            | Other diseases                     | 0.79                       | 0.53-1.18 | 0.44                    | 0.29-0.68  | 0.52                       | 0.41-0.66 | 0.68                     | 0.58-0.78  |
|                            | No disease                         | 1.57                       | 1.01-2.43 | 0.45                    | 0.25-0.81  | 4.05                       | 3.32-4.95 | 1.06                     | 0.85-1.32  |
|                            | Wald test, 7 df                    | $\chi^2=198.53, p<0.01$    |           | $\chi^2=374.96, p<0.01$ |            | $\chi^2=741.59, p<0.01$    |           | $\chi^2=1684.34, p<0.01$ |            |
| Religious affiliation      | Protestant                         | 1.29                       | 0.96-1.74 | 1.27                    | 0.99-1.62  | 1.81                       | 1.52-2.17 | 1.85                     | 1.64-2.08  |
|                            | <b>Catholic</b>                    | 1                          |           | 1                       |            | 1                          |           | 1                        |            |
|                            | No Affiliation                     | 2.76                       | 2.01-3.79 | 2.75                    | 2.14-3.55  | 5.49                       | 4.48-6.72 | 5.00                     | 4.37-5.70  |
|                            | Other/unknown                      | 1.52                       | 0.91-2.55 | 0.94                    | 0.57-1.54  | 1.86                       | 1.37-2.53 | 1.81                     | 1.46-2.25  |
|                            | Wald test, 3 df                    | $\chi^2=44.75, p<0.01$     |           | $\chi^2=73.00, p<0.01$  |            | $\chi^2=294.46, p<0.01$    |           | $\chi^2=600.21, p<0.01$  |            |
| Education                  | Compulsory                         | 0.64                       | 0.45-0.91 | 0.50                    | 0.36-0.70  | 0.54                       | 0.45-0.64 | 0.51                     | 0.45-0.57  |
|                            | <b>Secondary</b>                   | 1                          |           | 1                       |            | 1                          |           | 1                        |            |
|                            | Tertiary                           | 1.20                       | 0.91-1.59 | 1.45                    | 1.16-1.81  | 1.52                       | 1.29-1.80 | 1.49                     | 1.34-1.66  |
|                            | Unknown                            | 0.94                       | 0.38-2.29 | 0.38                    | 0.15-0.97  | 0.53                       | 0.27-1.04 | 0.59                     | 0.36-0.97  |
|                            | Wald test, 3 df                    | $\chi^2=9.36, p=0.02$      |           | $\chi^2=36.32, p<0.01$  |            | $\chi^2=94.71, p<0.01$     |           | $\chi^2=210.35, p<0.01$  |            |
| Marital status             | Single                             | 0.68                       | 0.46-1.01 | 0.92                    | 0.68-1.26  | 1.18                       | 0.87-1.61 | 0.92                     | 0.75-1.13  |
|                            | <b>Married</b>                     | 1                          |           | 1                       |            | 1                          |           | 1                        |            |
|                            | Widowed                            | 1.00                       | 0.59-1.71 | 0.90                    | 0.52-1.56  | 1.22                       | 0.99-1.49 | 1.43                     | 1.26-1.61  |
|                            | Divorced                           | 1.06                       | 0.75-1.49 | 1.19                    | 0.92-1.53  | 1.81                       | 1.42-2.31 | 1.83                     | 1.58-2.13  |
|                            | Wald test, 3 df                    | $\chi^2=5.27, p=0.15$      |           | $\chi^2=3.39, p=0.34$   |            | $\chi^2=23.72, p<0.01$     |           | $\chi^2=92.22, p<0.01$   |            |
| Type of household          | 1 person                           | 1.48                       | 1.08-2.02 | 1.36                    | 1.06-1.74  | 1.06                       | 0.88-1.27 | 0.97                     | 0.86-1.08  |
|                            | <b><math>\geq 2</math> persons</b> | 1                          |           | 1                       |            | 1                          |           | 1                        |            |
|                            | Institutions                       | 0.76                       | 0.30-1.93 | 0.63                    | 0.25-1.57  | 0.52                       | 0.33-0.81 | 0.86                     | 0.56-1.33  |
|                            | Wald test, 2 df                    | $\chi^2=7.15, p=0.03$      |           | $\chi^2=7.48, p=0.02$   |            | $\chi^2=10.35, p<0.01$     |           | $\chi^2=0.66, p=0.72$    |            |
| Children                   | <b>No</b>                          | 1                          |           | 1                       |            | 1                          |           | 1                        |            |
|                            | Yes                                | 0.73                       | 0.55-0.97 | 0.80                    | 0.63-1.02  | 0.91                       | 0.76-1.09 | 0.74                     | 0.66-0.83  |
|                            | Unknown                            | 0.75                       | 0.41-1.38 | 0.95                    | 0.57-1.57  | 0.60                       | 0.42-0.85 | 0.70                     | 0.55-0.89  |
|                            | Wald test, 1 df                    | $\chi^2=4.62, p=0.03$      |           | $\chi^2=3.28, p=0.07$   |            | $\chi^2=12.37, p<0.01$     |           | $\chi^2=25.85, p<0.01$   |            |
| Urbanicity                 | Urban                              | 1.02                       | 0.79-1.32 | 0.93                    | 0.74-1.16  | 1.17                       | 1.02-1.35 | 1.02                     | 0.93-1.13  |
|                            | <b>Peri-urban</b>                  | 1                          |           | 1                       |            | 1                          |           | 1                        |            |
|                            | Rural                              | 0.96                       | 0.68-1.35 | 0.95                    | 0.72-1.25  | 0.81                       | 0.65-1.01 | 0.71                     | 0.61-0.82  |
|                            | Wald test, 2 df                    | $\chi^2=0.13, p=0.94$      |           | $\chi^2=0.46, p=0.80$   |            | $\chi^2=0.99, p=0.32$      |           | $\chi^2=25.27, p<0.01$   |            |
| Neighbourhood index of SEP | <b>Lowest quintile</b>             | 1                          |           | 1                       |            | 1                          |           | 1                        |            |
|                            | Second quintile                    | 1.22                       | 0.81-1.86 | 1.32                    | 0.94-1.86  | 1.27                       | 0.97-1.65 | 1.04                     | 0.88-1.23  |
|                            | Third quintile                     | 1.32                       | 0.87-1.98 | 1.46                    | 1.03-2.05  | 1.57                       | 1.22-2.02 | 1.25                     | 1.06-1.48  |
|                            | Fourth quintile                    | 1.64                       | 1.09-2.47 | 1.78                    | 1.27-2.50  | 1.82                       | 1.42-2.33 | 1.56                     | 1.33-1.84  |
|                            | Highest quintile                   | 2.49                       | 1.67-3.72 | 2.11                    | 1.49-2.98  | 2.75                       | 2.16-3.52 | 2.26                     | 1.93-2.65  |
|                            | Wald test, 4 df                    | $\chi^2=26.13, p<0.01$     |           | $\chi^2=20.65, p<0.01$  |            | $\chi^2=89.86, p<0.01$     |           | $\chi^2=170.28, p<0.01$  |            |
| Language Region            | <b>German</b>                      | 1                          |           | 1                       |            | 1                          |           | 1                        |            |
|                            | French                             | 1.25                       | 0.96-1.63 | 1.39                    | 1.12-1.73  | 1.14                       | 0.97-1.33 | 1.24                     | 1.12-1.37  |
|                            | Italian                            | 1.00                       | 0.50-1.99 | 0.36                    | 0.15-0.88  | 1.05                       | 0.71-1.56 | 0.53                     | 0.38-0.75  |
|                            | Wald test, 2 df                    | $\chi^2=2.72, p=0.26$      |           | $\chi^2=15.20, p<0.01$  |            | $\chi^2=0.07, p=0.79$      |           | $\chi^2=12.83, p<0.01$   |            |
|                            | <b>Swiss</b>                       | 1                          |           | 1                       |            | 1                          |           | 1                        |            |
| Nationality                | Foreigner                          | 0.59                       | 0.38-0.91 | 0.73                    | 0.53-1.02  | 0.82                       | 0.62-1.08 | 0.88                     | 0.73-1.04  |
|                            | Wald test, 1 df                    | $\chi^2=5.60, p=0.02$      |           | $\chi^2=3.40, p=0.07$   |            | $\chi^2=1.98, p=0.16$      |           | $\chi^2=2.18, p=0.14$    |            |

**Supplementary table 6** Degrees of freedom (df), chi square (chi2) and p-values for likelihood ratio tests for interactions with time period (2003-2008 vs 2009-2014) in multivariable Cox respectively logistic regression models

| Variable                     | df | Cox regression |         | Logistic regression |         |
|------------------------------|----|----------------|---------|---------------------|---------|
|                              |    | chi2           | p-value | chi2                | p-value |
| <b>Age group 25-64 years</b> |    |                |         |                     |         |
| Sex                          | 1  | 0.07           | 0.7922  | 0.26                | 0.6124  |
| Diagnosis                    | 7  |                |         | 22.92               | 0.0018  |
| Religion                     | 3  | 3.71           | 0.2949  | 3.08                | 0.3790  |
| Education                    | 3  | 3.78           | 0.2868  | 3.66                | 0.3001  |
| Marital status               | 3  | 2.45           | 0.4837  | 2.61                | 0.4555  |
| Household                    | 2  | 0.88           | 0.6454  | 0.08                | 0.9629  |
| Parenthood                   | 1  | 0.50           | 0.4785  | 0.00                | 0.9578  |
| Urbanicity                   | 2  | 1.31           | 0.5205  | 0.38                | 0.8276  |
| SSEP                         | 4  | 2.10           | 0.7169  | 1.58                | 0.8120  |
| Language region              | 2  | 0.98           | 0.6133  | 3.79                | 0.1505  |
| Nationality                  | 1  | 0.32           | 0.5721  | 0.11                | 0.7387  |
| <b>Age group 65-94 years</b> |    |                |         |                     |         |
| Sex                          | 1  | 0.10           | 0.7524  | 0.44                | 0.5060  |
| Diagnosis                    | 7  |                |         | 134.80              | <0.001  |
| Religion                     | 3  | 3.42           | 0.3308  | 3.23                | 0.3581  |
| Education                    | 3  | 1.33           | 0.7220  | 1.52                | 0.6776  |
| Marital status               | 3  | 2.13           | 0.5453  | 3.86                | 0.2768  |
| Household                    | 2  | 1.27           | 0.5292  | 4.66                | 0.0972  |
| Parenthood                   | 1  | 1.67           | 0.1959  | 0.45                | 0.5015  |
| Urbanicity                   | 2  | 3.16           | 0.2055  | 3.30                | 0.1923  |
| SSEP                         | 4  | 3.29           | 0.5100  | 2.27                | 0.6854  |
| Language region              | 2  | 5.39           | 0.0676  | 5.58                | 0.0613  |
| Nationality                  | 1  | 0.94           | 0.3310  | 0.01                | 0.9200  |

**Supplementary table 7** Odds ratios and 95% Confidence Intervals (CI) for interactions between time period and diagnosis in multivariable logistic regression models (corrected for sex, age, religion, education, marital status, type of household, urbanization, the neighborhood index of socioeconomic position, language region and nationality)

|                        | Age group 25-64 |            | Age group 65-94 |           |
|------------------------|-----------------|------------|-----------------|-----------|
|                        | OR              | 95%CI      | OR              | 95%CI     |
| <b>Diagnosis</b>       |                 |            |                 |           |
| Cancer                 | 1 (Ref)         |            | 1 (Ref)         |           |
| Mental and behavioural | 1.67            | 0.84-3.31  | 0.71            | 0.48-1.07 |
| Nervous System         | 0.98            | 0.66-1.45  | 0.99            | 0.76-1.29 |
| Circulatory System     | 3.92            | 0.86-17.93 | 1.22            | 0.94-1.57 |
| Respiratory System     | 0.99            | 0.43-2.25  | 1.67            | 1.10-2.53 |
| Musculoskeletal System | 1.19            | 0.42-3.37  | 1.97            | 1.43-2.71 |
| Other diseases         | 0.56            | 0.32-1.00  | 1.32            | 0.99-1.76 |
| No disease             | 0.30            | 0.15-0.62  | 0.27            | 0.20-0.36 |
